# Supplementary material
Source: PubMed Central journal article supplement (PMC3989799)
Supplement: supp_113.212456_jpet212456SuppTables_pdf.pdf [file supp_113.212456_jpet212456SuppTables_pdf.pdf]

# A Targeted Proteomics Approach for Profiling Murine Cytochrome P450 Expression

Elisabeth M. Hersman and Namandjé N. Bumpus

Journal of Pharmacology and Experimental Therapeutics

**Supplemental Table 1. SRM assay transition list.** The cytochrome P450s and transitions monitored for the targeted mass spectrometric assay are outlined below. The three highest intensity transitions per peptide monitored were included in the final assay. The three transitions were used for qualitative assessment of the limit of detection, based on signal-to-noise ratio of the three transitions and consistent presence in replicates. MRMs are represented as parent/fragment in the order of highest transition m/z to lowest. The asterisks denote enzymes for which heavy labeled ( $^{13}\text{C}$  and  $^{15}\text{N}$ ) synthetic peptides were included in the assay for quantitation.

| Isozyme | MRM1 (transition)      | MRM2 (transition)     | MRM3 (transition)    |
|---------|------------------------|-----------------------|----------------------|
| 1A2     | 743.390/1008.588 (y8)  | 743.390/894.545 (y7)  | 743.390/747.476 (y6) |
| *1A2    | 747.398/1016.602 (y8)  | 747.398/902.559 (y7)  | 747.398/755.491 (y6) |
| 2A12    | 730.344/1047.449 (y9)  | 730.344/932.422 (y8)  | 730.344/795.363 (y7) |
| 2B9     | 586.303/1056.572 (y8)  | 586.303/893.509 (y7)  | 586.303/780.425 (y6) |
| 2B10    | 574.322/819.461 (y7)   | 574.322/621.324 (y5)  | 574.322/500.296 (y4) |
| *2B10   | 578.329/827.475 (y7)   | 578.329/629.338 (y5)  | 578.329/500.296 (y4) |
| 2C29    | 636.815/1045.495 (y9)  | 636.815/830.404 (y7)  | 636.815/743.372 (y6) |
| 2C37    | 473.820/783.57 (y7)    | 473.820/712.533 (y6)  | 473.820/599.449 (y5) |
| 2C39    | 426.253/704.430 (y6)   | 426.253/603.382 (y5)  | 426.253/490.298 (y4) |
| 2C50    | 673.886/975.583 (y9)   | 673.886/862.499 (y8)  | 673.886/761.452 (y8) |
| 2C54    | 693.344/973.449 (y9)   | 693.344/858.422 (y8)  | 693.344/721.363 (y7) |
| 2C67    | 482.285/616.378 (y5)   | 482.285/503.294 (y4)  | 482.285/247.144 (b2) |
| 2C70    | 733.836/1153.501 (y10) | 733.836/1040.417 (y9) | 733.836/797.331 (y7) |
| 2D9     | 629.825/828.473 (y6)   | 629.825/642.393 (y5)  | 629.825/385.256 (y3) |
| 2D10    | 606.840/780.473 (y7)   | 606.840/709.436 (y6)  | 606.840/504.245 (b5) |

|       |                        |                       |                      |
|-------|------------------------|-----------------------|----------------------|
| 2D22  | 599.796/695.383 (y6)   | 599.796/810.410 (y7)  | 599.796/369.224 (y3) |
| *2D22 | 604.800/705.392 (y6)   | 604.800/820.419 (y7)  | 604.800/379.233 (y3) |
| 2D26  | 679.367/975.468 (y8)   | 679.367/904.431 (y7)  | 679.367/454.302 (b5) |
| 2E1   | 623.833/963.468 (y8)   | 623.833/816.400 (y7)  | 623.833/702.357 (y6) |
| 2F2   | 553.309/890.519 (y8)   | 553.309/775.492 (y7)  | 553.309/662.408 (y6) |
| 2J5   | 763.406/1069.531 (y9)  | 763.406/1012.510 (y8) | 763.406/898.467 (y7) |
| 2U1   | 554.805/878.513 (y8)   | 554.805/731.445 (y7)  | 554.805/618.361 (y6) |
| 3A11  | 692.851/1143.553 (y10) | 692.851/786.399 (y7)  | 692.851/358.208 (y3) |
| *3A11 | 696.858/1151.567 (y10) | 696.858/794.413 (y7)  | 696.858/366.223 (y3) |
| 3A13  | 700.856/1073.526 (y9)  | 700.856/986.494 (y8)  | 700.856/839.426 (y7) |
| 3A25  | 396.255/644.434 (y6)   | 396.255/573.397 (y5)  | 396.255/460.313 (y4) |
| 4A10  | 621.323/1000.532 (y8)  | 621.323/887.448 (y7)  | 621.323/862.431 (b8) |
| 4A12A | 934.973/1207.595 (y10) | 934.973/1078.553 (y9) | 934.973/963.526 (y8) |
| 4B1   | 463.289/755.466 (y7)   | 463.289/642.382 (y6)  | 463.289/543.314 (y5) |
| 4F13  | 682.372/995.531 (y9)   | 682.372/848.462 (y8)  | 682.372/735.378 (y7) |
| 4V2   | 566.829/886.515(y8)    | 566.829/702.430 (y6)  | 566.829/603.361 (y5) |
| *4V2  | 571.833/896.523 (y8)   | 571.833/712.438 (y6)  | 571.833/613.370 (y5) |

## A Targeted Proteomics Approach for Profiling Murine Cytochrome P450 Expression

Elisabeth M. Hersman and Namandjé N. Bumpus

Journal of Pharmacology and Experimental Therapeutics

**Supplemental Table 2.** Lower limit of quantification (LLOQ) and upper limit of quantification (ULOQ) of the proteomics assay for peptides representing each cytochrome P450 protein. At least 6 peptide dilutions were found to be linear between the reported LLOQ and the ULOQ using a  $1/y^2$  weighted regression for all peptides except CYPs 2C37 and 4A10 which were calibrated across 5 dilutions. Asterisks indicate a peptide with a heavy label ( $^{13}\text{C}$  and  $^{15}\text{N}$ ).

| CYP   | LLOQ (fmol) | ULOQ (fmol) |
|-------|-------------|-------------|
| 1A2*  | 3           | 600         |
| 2A12  | 3           | 30000       |
| 2B9   | 3           | 30000       |
| 2B10* | 3           | 600         |
| 2C29  | 3           | 30000       |
| 2C37  | 30          | 3000        |
| 2C39  | 3           | 30000       |
| 2C50  | 60          | 30000       |
| 2C54  | 6           | 30000       |
| 2C67  | 30          | 30000       |
| 2C70  | 0.6         | 30000       |
| 2D9   | 6           | 30000       |
| 2D10  | 3           | 30000       |
| 2D22* | 0.6         | 600         |
| 2D26  | 60          | 30000       |
| 2E1   | 60          | 30000       |
| 2F2   | 3           | 30000       |
| 2J5   | 15          | 30000       |
| 2U1   | 3           | 30000       |
| 3A11* | 3           | 600         |
| 3A13  | 3           | 30000       |
| 3A25  | 15          | 30000       |
| 4A10  | 300         | 30000       |
| 4A12A | 30          | 30000       |
| 4B1   | 3           | 30000       |
| 4F13  | 60          | 30000       |
| 4V2*  | 3           | 600         |
